# Supplementary material for: Association between hematocrit-to-albumin ratio and acute kidney injury in patients with acute pancreatitis: a retrospective cohort study
Source: PubMed Central journal article supplement — Sci Rep. 2024 Nov 7;14:27113. doi: 10.1038/s41598-024-77842-4 (PMC11544263; doi:10.1038/s41598-024-77842-4), 2024-11-07
Supplement: 41598_2024_77842_MOESM1_ESM.pdf [file 41598_2024_77842_MOESM1_ESM.pdf]

**Association between hematocrit-to-albumin ratio and acute kidney injury in patients with acute pancreatitis: a retrospective cohort study**  
**supplementary materials**

Hospital admission information for patients with AP was extracted according to International Classification of Diseases, 9th Revision (ICD - 9) code 5770 and 10th Revision (ICD - 10) codes K859, K8520, K8580, K8591, K8500, K8592, K8511, K8530, K853, K8581, K850, K8501, K8582, K8502, K8531, K8590, K858, K8510, K851, K8512, K860, K852, K8521, K8522, K51011, K51018, K51019, J0140, and J0141, with a total of 1609 had been admitted to the ICU.

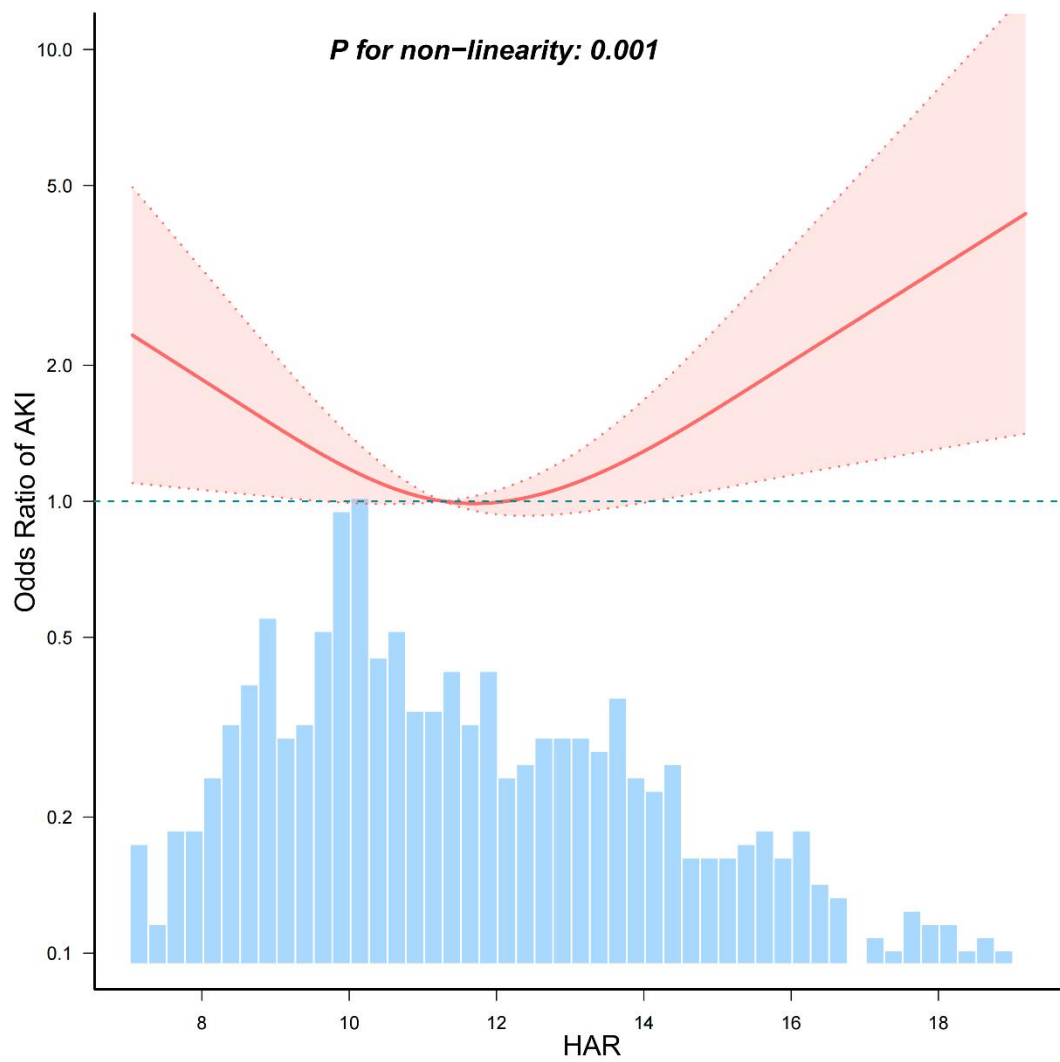

**Figure S1.** The Nonlinear association between HAR and AKI in patients with acute pancreatitis. Adjusted for all covariates as model 3 with MIMIC-IV database. Solid lines represent the odds ratio of AKI and dotted lines represent the corresponding 95% CI. OR = 1 was set as the reference line. (takes the upper limit of 97%).

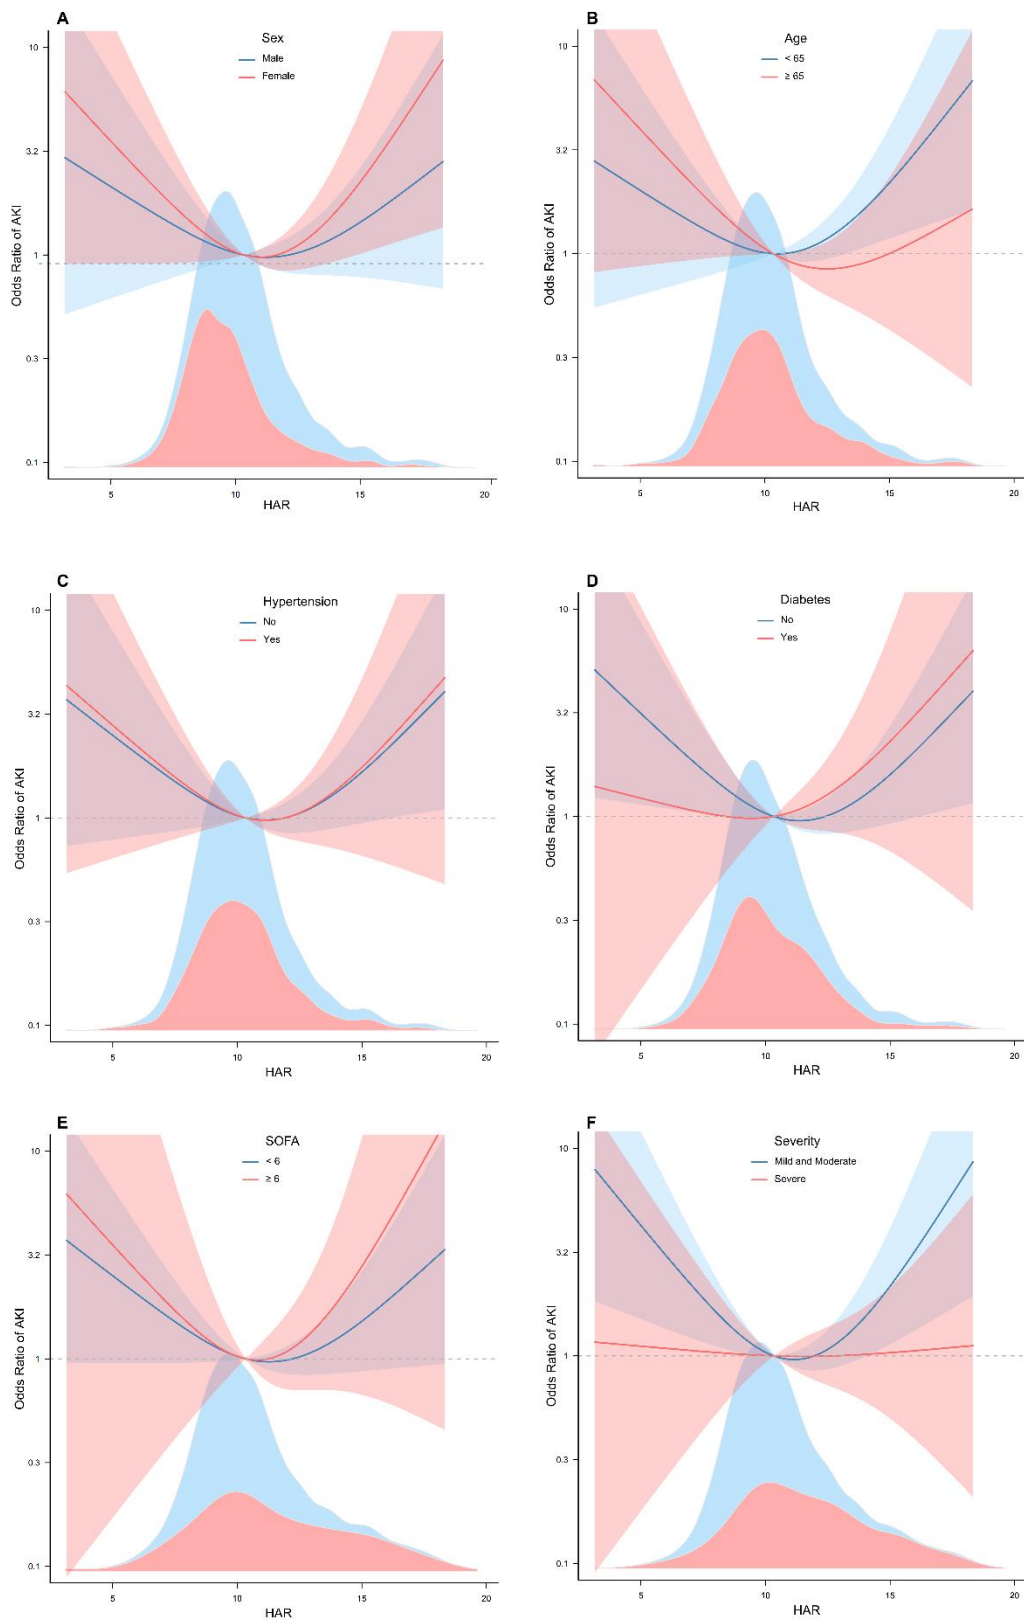

**Figure S2.** Subgroups with Chinese population. Solid lines represent the odds ratio of AKI and dotted lines represent the corresponding 95% CI. ORs were adjusted for variates with

model 3. OR = 1 was set as the reference line.

| Characteristics           | Chinese population<br>Total<br>(n = 1514) | MIMIC-IV<br>Total<br>(n = 672) |
|---------------------------|-------------------------------------------|--------------------------------|
| Sex (%)                   |                                           |                                |
| male                      | 812 (53.6)                                | 387 (57.6)                     |
| female                    | 702 (46.4)                                | 285 (42.4)                     |
| Age (years)               | 53.0 (41.0, 65.0)                         | 56.0 (45.0, 70.0)              |
| Death (%)                 | 23 (1.5)                                  | 96 (14.3)                      |
| ICU (%)                   | 247 (16.3)                                | N/A                            |
| LOS (days)                | 16.6 ± 12.7                               | 12.0 (6.0, 20.0)               |
| Hypertension (%)          | 392 (25.9)                                | 375 (55.8)                     |
| DM (%)                    | 225 (14.9)                                | 255 (37.9)                     |
| CHD (%)                   | 103 (6.8)                                 | 123 (18.3)                     |
| SBP (mmHg)                | 129.0 (117.0, 143.0)                      | 126.0 (110.0, 144.2)           |
| DBP (mmHg)                | 80.0 (72.0, 90.0)                         | 73.0 (61.0, 85.0)              |
| HR (bpm)                  | 80.0 (72.0, 93.0)                         | 98.5 (83.0, 114.0)             |
| RR (bpm)                  | 20.0 (19.0, 20.0)                         | 22.0 (18.0, 26.0)              |
| SpO <sub>2</sub> (%)      | 99.0 (97.0, 100.0)                        | N/A                            |
| P/F                       | N/A                                       | 218.2 (152.7, 329.0)           |
| Ventilation (%)           | 158 (10.4)                                | 556 (82.7)                     |
| Transfusion (%)           | 168 (11.1)                                | 61 (9.1)                       |
| CRRT (%)                  | 92 (6.1)                                  | 55(8.2)                        |
| WBC (×10 <sup>9</sup> /L) | 9.8 (6.6, 13.6)                           | 11.8 (7.7, 17.5)               |
| HGB (g/L)                 | 129.0 (114.0, 145.0)                      | 11.4 (10.0, 13.0)              |
| HCT (%)                   | 38.5 (34.5, 42.7)                         | 34.2 (30.0, 39.2)              |
| PCT (ng/ml)               | 0.2 (0.1, 0.9)                            | N/A                            |
| CRP (mg/L)                | 37.1 (6.6, 134.7)                         | N/A                            |
| AST (U/L)                 | 41.0 (23.0, 139.5)                        | 73.0 (35.0, 178.2)             |
| ALB (g/dl)                | 3.8 (3.4, 4.2)                            | 3.0 (2.6, 3.5)                 |
| FPG (mmol/L)              | 6.7 (5.3, 9.1)                            | 7.3 (5.6, 10.1)                |
| TG (mmol/L)               | 1.5 (1.0, 3.6)                            | 1.8 (1.1, 3.9)                 |
| Na (mmol/L)               | 139.6 (136.7, 141.8)                      | 138.0 (135.0, 141.0)           |
| Ca (mmol/L)               | 2.2 (2.0, 2.4)                            | 2.0 (1.9, 2.1)                 |
| CREA (μmol/L)             | 68.0 (55.0, 85.2)                         | 97.2 (61.9, 159.1)             |
| Lac (mmol/L)              | N/A                                       | 1.7 (1.2, 2.6)                 |
| AKI (%)                   | 257 (17.0)                                | 322 (47.9)                     |
| SOFA                      | 2.7 ± 2.5                                 | 5.0 (3.0, 9.0)                 |
| Etiology (%)              |                                           | N/A                            |

|                   |                |     |
|-------------------|----------------|-----|
| biliary           | 1019 (67.3)    |     |
| hyperlipidemic    | 354 (23.4)     |     |
| alcoholic         | 51 (3.4)       |     |
| others            | 90 (5.9)       |     |
| Severity (%)      |                | N/A |
| mild and moderate | 1343 (88.7)    |     |
| severe            | 171 (11.3)     |     |
| BISAP             | 1.0 (0.0, 2.0) | N/A |

**Table S1.** Baseline characteristics of included patients grouped by two databases of Chinese population and MIMIC-IV.

| Variables                | Total (n = 1514)     | Non-ICU (n = 1267)   | ICU (n = 247)        | p       |
|--------------------------|----------------------|----------------------|----------------------|---------|
| Sex (%)                  |                      |                      |                      | 0.108   |
| male                     | 812 (53.6)           | 668 (52.7)           | 144 (58.3)           |         |
| female                   | 702 (46.4)           | 599 (47.3)           | 103 (41.7)           |         |
| Age (years)              | 53.0 (41.0, 65.0)    | 52.0 (41.0, 64.0)    | 58.0 (44.5, 70.0)    | < 0.001 |
| Hypertension (%)         | 392 (25.9)           | 319 (25.2)           | 73 (29.6)            | 0.151   |
| DM (%)                   | 225 (14.9)           | 181 (14.3)           | 44 (17.8)            | 0.154   |
| CHD (%)                  | 103 (6.8)            | 76 (6)               | 27 (10.9)            | 0.005   |
| COPD (%)                 | 64 (4.2)             | 47 (3.7)             | 17 (6.9)             | 0.023   |
| Weight(kg)               | 64.0 (55.0, 75.0)    | 65.0 (56.0, 75.0)    | 62.0 (54.0, 75.0)    | 0.136   |
| Height(cm)               | 164.0 (158.0, 170.0) | 163.0 (157.5, 170.0) | 167.0 (160.0, 172.0) | < 0.001 |
| BMI                      | 24.2 (21.7, 26.7)    | 24.2 (22.0, 26.7)    | 23.1 (20.2, 26.6)    | < 0.001 |
| SBP (mmHg)               | 129.0 (117.0, 143.0) | 130.0 (119.0, 143.0) | 123.0 (106.5, 145.0) | < 0.001 |
| DBP (mmHg)               | 80.0 (72.0, 90.0)    | 80.0 (73.0, 90.0)    | 78.0 (66.0, 88.0)    | < 0.001 |
| HR (bpm)                 | 80.0 (72.0, 93.0)    | 78.0 (72.0, 90.0)    | 95.0 (80.0, 114.5)   | < 0.001 |
| Temperature              | 36.5 (36.4, 36.7)    | 36.5 (36.4, 36.6)    | 36.6 (36.5, 36.8)    | < 0.001 |
| RR (bpm)                 | 20.0 (19.0, 20.0)    | 20.0 (19.0, 20.0)    | 20.0 (19.0, 23.0)    | < 0.001 |
| SpO <sub>2</sub> (%)     | 99.0 (97.0, 100.0)   | 99.0 (98.0, 100.0)   | 97.0 (94.0, 99.0)    | < 0.001 |
| Ventilation (%)          | 158 (10.4)           | 5 (0.4)              | 153 (61.9)           | < 0.001 |
| Transfusion (%)          | 168 (11.1)           | 36 (2.8)             | 132 (53.4)           | < 0.001 |
| CRRT (%)                 | 92 (6.1)             | 16 (1.3)             | 76 (30.8)            | < 0.001 |
| WBC( $\times 10^9/L$ )   | 9.8 (6.6, 13.6)      | 9.6 (6.5, 13.1)      | 11.7 (8.1, 17.4)     | < 0.001 |
| HGB(g/L)                 | 129.0 (114.0, 145.0) | 129.0 (115.5, 145.0) | 127.0 (100.0, 144.5) | 0.009   |
| HCT (%)                  | 38.5 (34.5, 42.7)    | 38.7 (34.9, 42.5)    | 37.9 (30.2, 43.0)    | 0.020   |
| PLT( $\times 10^9/L$ )   | 179.0 (137.0, 233.0) | 183.0 (142.0, 234.0) | 157.0 (110.5, 216.0) | < 0.001 |
| NEUT( $\times 10^9/L$ )  | 8.2 (4.9, 11.6)      | 7.9 (4.7, 11.2)      | 9.6 (6.6, 15.1)      | < 0.001 |
| LYMPH( $\times 10^9/L$ ) | 1.0 (0.7, 1.4)       | 1.0 (0.7, 1.4)       | 0.8 (0.6, 1.2)       | < 0.001 |

|                            |                      |                      |                      |         |
|----------------------------|----------------------|----------------------|----------------------|---------|
| MONO( $\times 10^9/L$ )    | 0.6 (0.4, 0.8)       | 0.5 (0.4, 0.7)       | 0.6 (0.4, 1.0)       | < 0.001 |
| RDW (fL)                   | 13.0 (12.4, 13.7)    | 13.1 (12.5, 13.7)    | 12.8 (12.3, 13.3)    | < 0.001 |
| PCT (ng/ml)                | 0.2 (0.1, 0.9)       | 0.1 (0.0, 0.5)       | 1.3 (0.4, 8.1)       | < 0.001 |
| CRP (mg/L)                 | 37.1 (6.6, 134.7)    | 31.4 (5.9, 116.6)    | 93.4 (14.4, 206.5)   | < 0.001 |
| AST(U/L)                   | 41.0 (23.0, 139.5)   | 38.0 (22.0, 134.0)   | 54.0 (31.0, 186.5)   | < 0.001 |
| ALT(U/L)                   | 46.0 (22.0, 153.0)   | 47.0 (22.0, 157.0)   | 41.0 (21.0, 95.0)    | 0.114   |
| TBIL ( $\mu\text{mol/L}$ ) | 21.8 (13.3, 42.6)    | 22.2 (13.7, 43.7)    | 20.1 (11.8, 37.5)    | 0.056   |
| DBIL ( $\mu\text{mol/L}$ ) | 7.8 (4.0, 22.2)      | 7.7 (4.0, 23.0)      | 8.9 (4.3, 21.2)      | 0.292   |
| ALB (g/dl)                 | 3.8. (3.4, 4.2)      | 3.9.3(3.5, 4.3)      | 3.2 (2.8, 3.8)       | < 0.001 |
| FPG (mmol/L)               | 6.7 (5.3, 9.1)       | 6.6 (5.3, 8.9)       | 7.9 (5.8, 11.1)      | < 0.001 |
| AMY(U/L)                   | 167.5 (67.0, 699.8)  | 164.0 (65.7, 703.0)  | 193.0 (79.5, 637.0)  | 0.139   |
| LIPASE(U/L)                | 204.1 (69.3, 716.4)  | 208.0 (69.8, 733.8)  | 185.4 (65.2, 650.0)  | 0.421   |
| PA (mg/L)                  | 160.1 (107.8, 212.8) | 163.3 (113.0, 209.7) | 136.0 (89.2, 250.0)  | 0.119   |
| HbA1c                      | 5.9 (5.4, 7.2)       | 5.9 (5.4, 7.2)       | 5.9 (5.4, 7.4)       | 0.348   |
| TG (mmol/L)                | 1.5 (1.0, 3.6)       | 1.5 (1.0, 3.8)       | 1.7 (1.1, 3.2)       | 0.207   |
| CHOL (mmol/L)              | 4.6 (3.7, 5.9)       | 4.6 (3.8, 5.8)       | 4.5 (3.1, 9.9)       | 0.588   |
| LDL (mmol/L)               | 2.1 (1.5, 2.9)       | 2.2 (1.5, 2.9)       | 1.7 (1.1, 2.6)       | < 0.001 |
| HDL (mmol/L)               | 1.1 (0.8, 1.5)       | 1.2 (0.9, 1.5)       | 0.7 (0.4, 1.2)       | < 0.001 |
| Na(mmol/L)                 | 139.6 (136.7, 141.8) | 139.6 (136.9, 141.7) | 138.8 (135.4, 142.1) | 0.136   |
| Ca(mmol/L)                 | 2.2 (2.0, 2.4)       | 2.2 (2.1, 2.4)       | 2.0 (1.8, 2.2)       | < 0.001 |
| BUN (mmol/L)               | 5.3 (4.0, 7.1)       | 5.0 (3.9, 6.5)       | 8.4 (5.5, 14.1)      | < 0.001 |
| CREA ( $\mu\text{mol/L}$ ) | 68.0 (55.0, 85.2)    | 66.0 (53.5, 79.0)    | 101.0 (69.0, 195.5)  | < 0.001 |
| HAR                        | 10.1 (9.0, 11.3)     | 10.0 (9.0, 11.0)     | 11.0 (9.5, 13.2)     | < 0.001 |
| Etiology of AP (%)         | nan                  | nan                  | nan                  | < 0.001 |
| biliary                    | 1019 (67.3)          | 916 (72.3)           | 103 (41.7)           |         |
| hyperlipidemic             | 354 (23.4)           | 310 (24.5)           | 44 (17.8)            |         |
| alcoholic                  | 51 (3.4)             | 41 (3.2)             | 10 (4)               |         |
| others                     | 90 (5.9)             | 0 (0)                | 90 (36.4)            |         |
| Severity (%)               | nan                  | nan                  | nan                  | < 0.001 |
| mild and moderate          | 1343 (88.7)          | 1266 (99.9)          | 77 (31.2)            |         |
| severe                     | 171 (11.3)           | 1 (0.1)              | 170 (68.8)           |         |
| SOFA                       | 2.7 $\pm$ 2.5        | 2.1 $\pm$ 1.6        | 5.9 $\pm$ 3.7        | < 0.001 |
| BISAP                      | 1.0 (0.0, 2.0)       | 1.0 (0.0, 2.0)       | 2.0 (1.0, 3.0)       | < 0.001 |
| Death (%)                  | 23 (1.5)             | 0 (0)                | 23 (9.3)             | < 0.001 |
| LOS(days)                  | 16.6 $\pm$ 12.7      | 15.0 $\pm$ 8.2       | 25.2 $\pm$ 23.6      | < 0.001 |
| ICU (%)                    | 247 (16.3)           | 0 (0)                | 247 (100)            | < 0.001 |
| AKI (%)                    | 257 (17.0)           | 125 (9.9)            | 132 (53.4)           | < 0.001 |

**Table S2.** Non-ICU vs. ICU in Chinese population

| Characteristics                        | OR_95CI             | p-value |
|----------------------------------------|---------------------|---------|
| Sex                                    | 0.53 (0.4~0.71)     | <0.001  |
| Age                                    | 1.01 (1.01~1.02)    | 0.001   |
| Death                                  | 18.86 (6.93~51.29)  | <0.001  |
| LOS                                    | 1.02 (1.01~1.03)    | <0.001  |
| ICU                                    | 10.49 (7.69~14.31)  | <0.001  |
| Hypertension                           | 1.63 (1.22~2.18)    | 0.001   |
| DM                                     | 1.4 (0.99~1.99)     | 0.06    |
| CHD                                    | 1.72 (1.08~2.75)    | 0.022   |
| SBP                                    | 0.99 (0.98~1)       | 0.001   |
| DBP                                    | 0.99 (0.98~1)       | 0.003   |
| HR                                     | 1.03 (1.02~1.04)    | <0.001  |
| RR                                     | 1.04 (1.02~1.06)    | <0.001  |
| SpO <sub>2</sub>                       | 0.85 (0.81~0.89)    | <0.001  |
| Ventilation                            | 8.02 (5.64~11.39)   | <0.001  |
| Transfusion                            | 10.45 (7.38~14.81)  | <0.001  |
| CRRT                                   | 22.47 (13.48~37.44) | <0.001  |
| WBC                                    | 1.07 (1.05~1.09)    | <0.001  |
| HGB                                    | 1 (0.99~1)          | 0.277   |
| HCT                                    | 0.97 (0.95~0.99)    | 0.012   |
| PCT                                    | 1.02 (1.01~1.02)    | <0.001  |
| CRP                                    | 1 (1~1.01)          | <0.001  |
| AST                                    | 1 (1~1)             | 0.036   |
| ALB                                    | 0.91 (0.89~0.93)    | <0.001  |
| FPG                                    | 1.06 (1.04~1.08)    | <0.001  |
| TG                                     | 1.03 (1.01~1.05)    | 0.005   |
| Na                                     | 0.94 (0.91~0.97)    | <0.001  |
| Ca                                     | 0.16 (0.09~0.26)    | <0.001  |
| CREA                                   | 1.06 (1.05~1.06)    | <0.001  |
| SOFA                                   | 1.48 (1.4~1.57)     | <0.001  |
| BISAP                                  | 1.845(1.64~2.08)    | <0.001  |
| Severity. severe vs. mild and moderate | 9.11 (6.46~12.85)   | <0.001  |
| Etiology. Hyperlipidemic vs. biliary   | 1.51 (1.09~2.09)    | 0.013   |
| Etiology. Alcoholic vs. biliary        | 1.44 (0.69~3.03)    | 0.336   |
| Etiology. Others vs. biliary           | 8.79 (5.57~13.85)   | <0.001  |
| HAR                                    | 1.24(1.17~1.32)     | <0.001  |

**Table S3.** Univariate Logistic regression analysis for AKI in Chinese population.

|                 | Chinese population           |                                      | MIMIC-IV population          |                                      |
|-----------------|------------------------------|--------------------------------------|------------------------------|--------------------------------------|
| Characteristics | The number of missing values | The percentage of missing values (%) | The number of missing values | The percentage of missing values (%) |
| Age             | 0                            | 0.0                                  | 0                            | 0.0                                  |
| AKI             | 0                            | 0.0                                  | 0                            | 0.0                                  |
| ALB             | 7                            | 0.4499                               | 0                            | 0.0                                  |
| ALT             | 7                            | 0.4499                               | 14                           | 2.0833                               |
| AMY             | 57                           | 3.6632                               | 377                          | 56.1012                              |
| AST             | 78                           | 5.0129                               | 12                           | 1.7857                               |
| BISAP           | 1                            | 0.0643                               | 672                          | 100                                  |
| BMI             | 53                           | 3.4062                               | 672                          | 100                                  |
| BUN             | 1                            | 0.0643                               | 3                            | 0.4464                               |
| Ca              | 1                            | 0.0643                               | 6                            | 0.8929                               |
| CHD             | 0                            | 0.0                                  | 0                            | 0.0                                  |
| CHOL            | 284                          | 18.2519                              | N/A                          | N/A                                  |
| CKD             | 0                            | 0.0                                  | N/A                          | N/A                                  |
| COPD            | 0                            | 0.0                                  | N/A                          | N/A                                  |
| CREA            | 0                            | 0.0                                  | 1                            | 0.1488                               |
| CRP             | 25                           | 1.6067                               | 656                          | 97.619                               |
| CRRT            | 0                            | 0.0                                  | 0                            | 0.0                                  |
| DBIL            | 7                            | 0.4499                               | 534                          | 79.4643                              |
| DBP             | 236                          | 15.1671                              | 1                            | 0.1488                               |
| Death           | 0                            | 0.0                                  | 0                            | 0.0                                  |
| DM              | 0                            | 0.0                                  | 0                            | 0.0                                  |
| Etiology        | 0                            | 0.0                                  | 672                          | 100                                  |
| FPG             | 89                           | 5.7198                               | 517                          | 76.9345                              |
| HBA1c           | 1046                         | 67.2237                              | 672                          | 100                                  |
| HCT             | 0                            | 0.0                                  | 0                            | 0.0                                  |
| HDL             | 285                          | 18.3162                              | 672                          | 100                                  |
| Height          | 53                           | 3.4062                               | 301                          | 44.7917                              |
| HGB             | 0                            | 0.0                                  | 0                            | 0.0                                  |
| HR              | 237                          | 15.2314                              | 0                            | 0.0                                  |
| Hypertension    | 0                            | 0.0                                  | 0                            | 0.0                                  |
| ICU             | 0                            | 0.0                                  | 0                            | 0.0                                  |
| LDL             | 285                          | 18.3162                              | 672                          | 100                                  |
| LIPASE          | 170                          | 10.9254                              | 672                          | 100                                  |
| LOS             | 0                            | 0.0                                  | 0                            | 0.0                                  |
| LYMPH           | 0                            | 0.0                                  | 672                          | 100                                  |
| MONO            | 0                            | 0.0                                  | 339                          | 50.4464                              |
| Na              | 1                            | 0.0643                               | 1                            | 0.1488                               |



|                  |     |         |     |         |
|------------------|-----|---------|-----|---------|
| NEU              | 0   | 0.0     | 326 | 48.5119 |
| PA               | 498 | 32.0051 | 672 | 100     |
| PCT              | 241 | 15.4884 | 672 | 100     |
| PLT              | 0   | 0.0     | 0   | 0.0     |
| RR               | 239 | 15.3599 | 0   | 0.0     |
| SBP              | 236 | 15.1671 | 1   | 0.1488  |
| Severity         | 0   | 0.0     | 672 | 100     |
| Sex              | 0   | 0.0     | 0   | 0.0     |
| SOFA             | 7   | 0.4499  | 0   | 0.0     |
| SpO <sub>2</sub> | 422 | 27.1208 | 672 | 100     |
| TBIL             | 7   | 0.4499  | 6   | 0.8929  |
| Temperature      | 19  | 1.2211  | 672 | 100     |
| TG               | 103 | 6.6195  | 416 | 61.9048 |
| Transfusion      | 0   | 0.0     | 0   | 0.0     |
| Ventilation      | 0   | 0.0     | 0   | 0.0     |
| WBC              | 0   | 0.0     | 0   | 0.0     |
| Weight           | 52  | 3.3419  | 21  | 3.125   |
| Lac              | 917 | 60.5680 | 169 | 25.1488 |

**Table S4.** Details of missing values in two databases of Chinese population and MIMIC-IV.

**Abbreviation:** LOS Length of hospital stay, DM diabetes mellitus, CHD coronary heart disease, SBP systolic blood pressure, DBP diastolic blood pressure, HR heart rate, RR respiratory rate, SpO<sub>2</sub> pulse oxygen saturation, P/F PaO<sub>2</sub>/FiO<sub>2</sub>, Ventilation noninvasive or invasive mechanical ventilation, Transfusion blood transfusion, CRRT continuous renal replacement treatment, WBC white blood cell count, HGB hemoglobin, HCT hematocrit, PCT procalcitonin, CRP C-reactive protein, AST aspartate aminotransferase, ALB albumin, FPG fasting plasma glucose, TG triglyceride, Na sodium, Ca calcium, CREA creatinine, Lac lactic acid, AKI Acute kidney injury, SOFA sequential organ failure assessment score, BISAP Bedside Index of Severity in Acute Pancreatitis score, HAR dividing the hematocrit level (%) by the ALB level (g/dl).
